# Supplementary material
Source: publisher site journal article supplement (https://www.spandidos-publications.com/863/downloadSupplementary)
Supplement: Supplementary file 1 [file downloadSupplementary]

Figure S1. Solubility of 0.5-100 mg/ml NTS in DMSO. NTS, non-toxic sulfur.

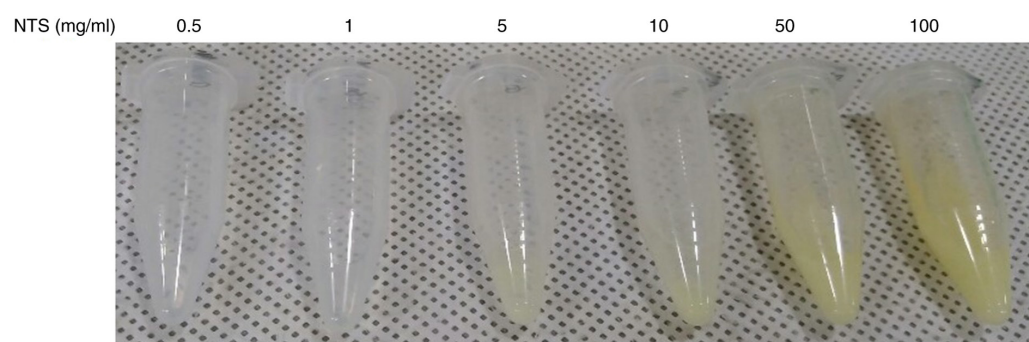

Figure S2. Growth hormone levels in C2C12 cells following treatment with DMSO and NTS for 24 h. Data are representative of three independent experiments. \*\*P<0.01. NTS, non-toxic sulfur; Con, control.

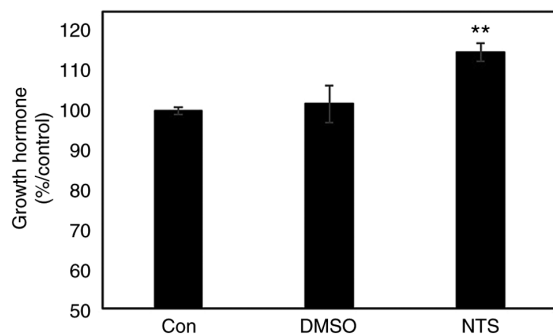

Figure S3. Relative pIGF-1R $\beta$ /IGF-1R $\beta$ , pJak2/Jak2 and pSTAT5/STAT5b protein levels were determined by densitometry analysis. Data are representative of three independent experiments. \*\*\*P<0.001 among all groups; #P<0.001 vs. control. IGF-1R $\beta$ , insulin-like growth factor-1 receptor  $\beta$ ; p, phosphorylated; NTS, non-toxic sulfur; Con, control.

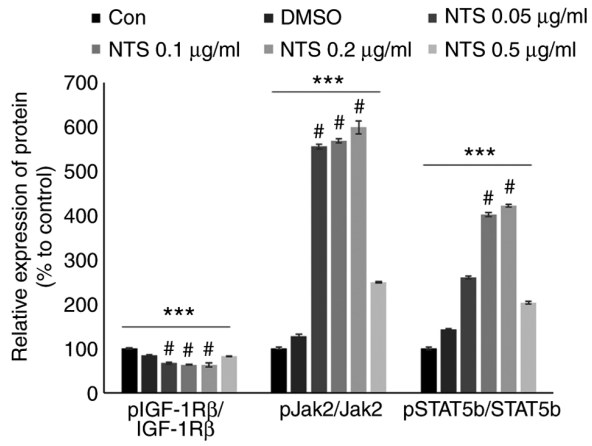

Figure S4. Relative pIGF-1R $\beta$ /IGF-1R $\beta$ , pJak2/Jak2 and pSTAT5/STAT5b protein levels were determined by densitometry analysis. Data are representative of three independent experiments. \*\*\*P<0.001 among all groups; #P<0.001 vs. control. IGF-1R $\beta$ , insulin-like growth factor-1 receptor  $\beta$ ; p, phosphorylated; NTS, non-toxic sulfur; Con, control; GH, growth hormone.

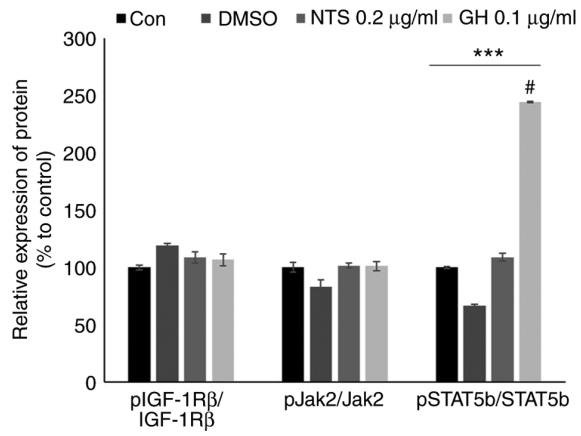

Table SI. Solubility of NTS in various solvents.

| Solvent     | Distilled water |   |   | Hot distilled water |   |   | DMSO |   |   | Ethanol |   |   |
|-------------|-----------------|---|---|---------------------|---|---|------|---|---|---------|---|---|
|             | 1               | 2 | 5 | 1                   | 2 | 5 | 1    | 2 | 5 | 1       | 2 | 5 |
| NTS (mg/ml) | 1               | 2 | 5 | 1                   | 2 | 5 | 1    | 2 | 5 | 1       | 2 | 5 |
| Results     | X               | X | X | X                   | X | X | O    | Δ | X | Δ       | Δ | X |

X, insoluble; Δ, slightly soluble; O, soluble.
